# Supplementary material for: Reductant-dependent DNA-templated silver nanoparticle formation kinetics
Source: Royal Society of Chemistry journal article supplement (doi:10.1039/d3cp02623j), 2023-01-01
Supplement: d3cp02623j1.pdf [file d3cp02623j1.pdf]

Article

# **Supplementary Information: Reductant-dependent DNA-templated silver nanoparticle formation kinetics**

Zi-Yang Yang, Wen-Yan Jiang, and Shi-Yong Ran\*

Department of Physics, Wenzhou University, Wenzhou 325035, China

---

\*To whom correspondence should be addressed. E-mail: syran@wzu.edu.cn.

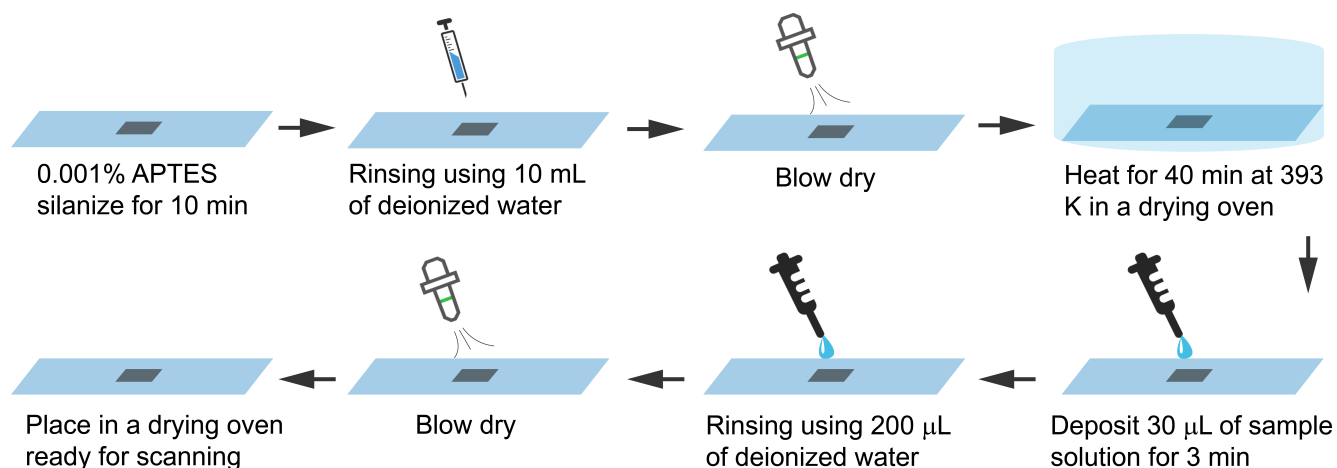

**Figure S1** Procedures of the sample preparation for AFM characterization.

## 1 Force-dependent kinetics in the presence of different reductants

As shown in Fig.S6, in 0.01 mM  $\text{AgNO}_3$  solution, exerting a force of 7.2 pN resulted in decrease–increase kinetics in the presence of 0.1 mM  $\text{NaBH}_4$ . In contrast, given the same conditions, forces larger than 11.5 pN could inhibit the decrease in kinetics and directly cause DNA restoration. With the  $[\text{reductant}]/[\text{Ag}^+]$  ratio fixed at 10, an increased  $\text{Ag}^+$  concentration (1 mM) resulted in direct particle formation kinetics even at forces as high as 13.8 pN. This proved that  $\text{NaBH}_4$  is very efficient in facilitating AgNP formation. In contrast to the strong effect of  $\text{NaBH}_4$  in 1 mM  $\text{AgNO}_3$  solution, in the presence of 10 mM L-ascorbic acid, the decrease kinetics exhibited at a force of 11.8 pN was inhibited by exerting a larger force of 14.2 pN, resulting in direct DNA recovery kinetics. Finally, a critical force value close to 2.9 pN was required to stop the nucleation dynamics in the presence of 10 mM sodium citrate and 1 mM  $\text{Ag}^+$ . The results were consistent with the statements and the model in the manuscript. Namely, external forces created an additional energy barrier for the nucleation; addition of different re-

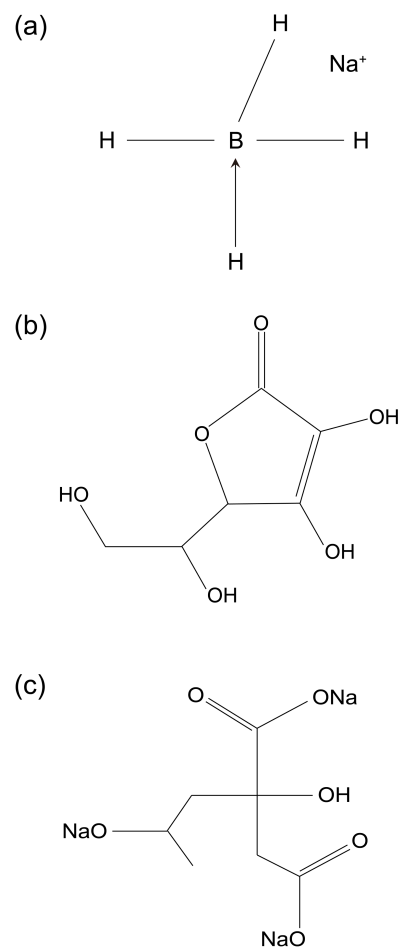

**Figure S2** Chemical structures of  $\text{NaBH}_4$ , L-ascorbic acid, and sodium citrate.

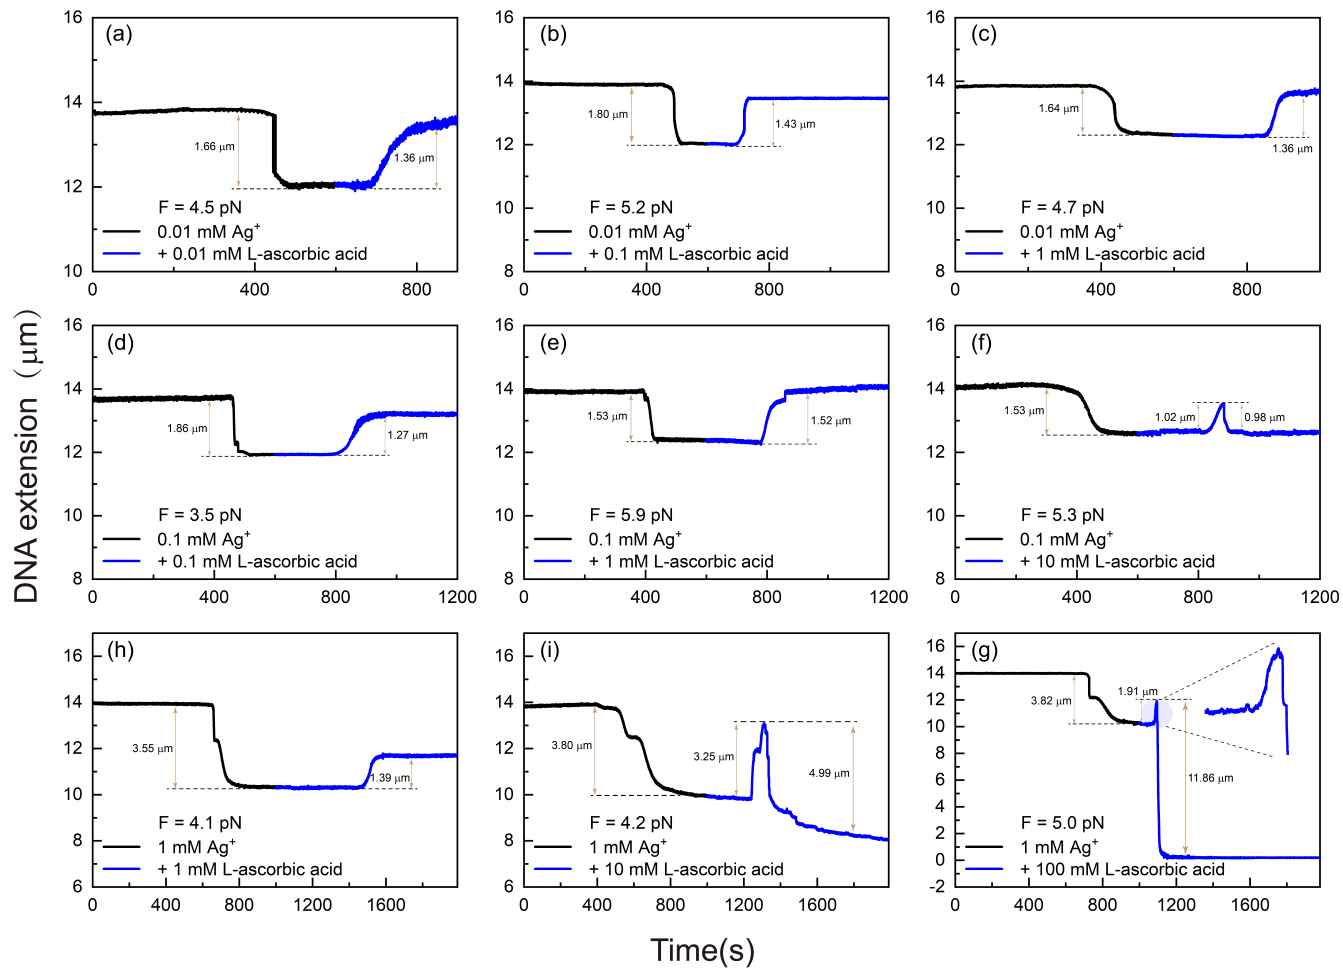

**Figure S3** Extension–time curves of  $\lambda$ -DNA in the presence of L-ascorbic acid. From top to bottom,  $[\text{Ag}^+] = 0.01, 0.1$  and  $1$  mM, respectively. From left to right,  $[\text{L-ascorbic acid}]/[\text{Ag}^+] = 1, 10$ , and  $100$ , respectively.

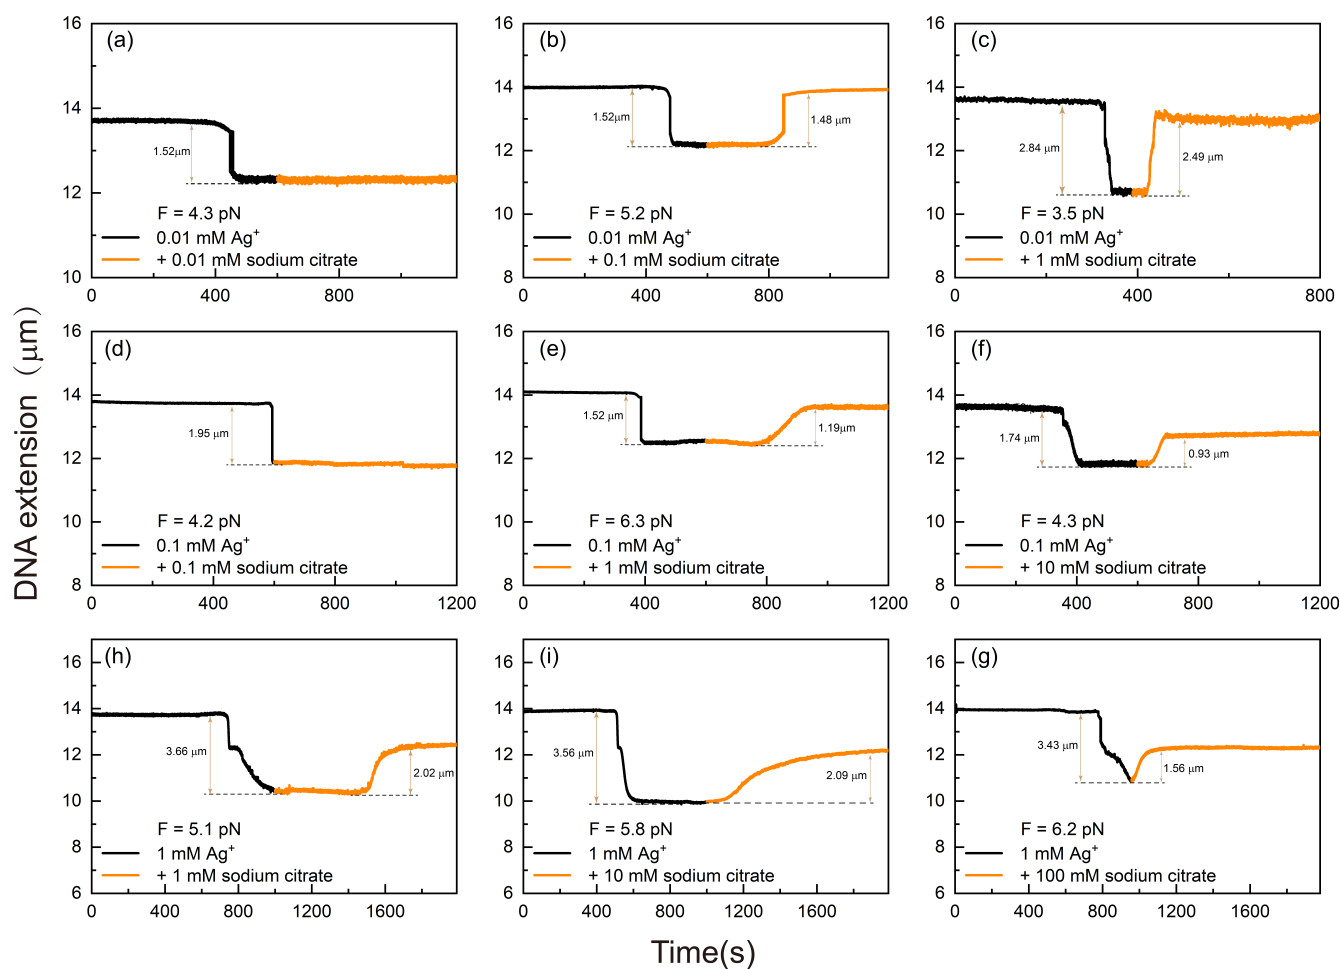

**Figure S4** Extension–time curves of  $\lambda$ -DNA in the presence of sodium citrate. From top to bottom,  $[\text{Ag}^+] = 0.01, 0.1$  and  $1$  mM, respectively. From left to right,  $[\text{sodium citrate}]/[\text{Ag}^+] = 1, 10$ , and  $100$ , respectively.

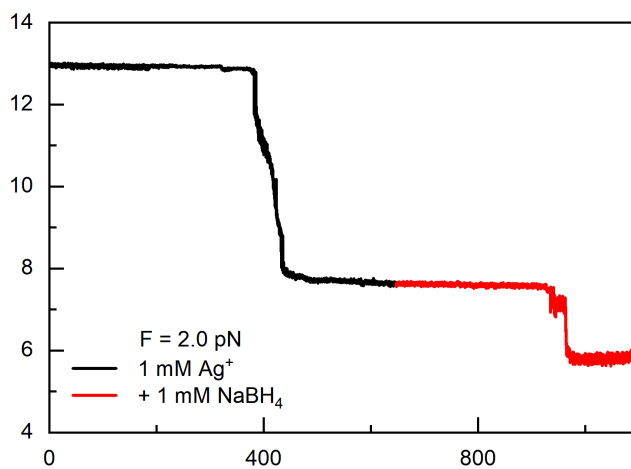

**Figure S5** Extension–time curve of  $\lambda$ -DNA under small force ( $F = 2.0$  pN).  $[\text{Ag}^+] = 1$  mM,  $[\text{NaBH}_4] = 1$  mM.

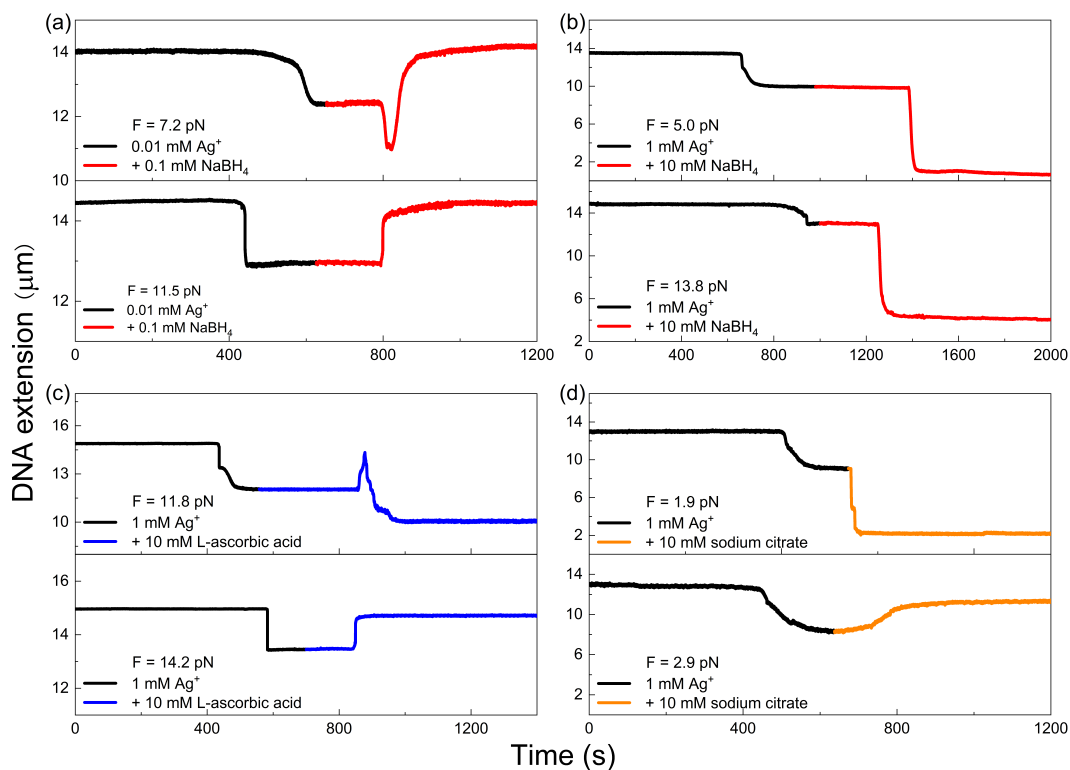

**Figure S6** Extension–time curves of  $\lambda$ -DNA under different forces. (a) 0.01 mM  $\text{Ag}^+$  + 0.1 mM  $\text{NaBH}_4$ ; (b) 1 mM  $\text{Ag}^+$  + 10 mM  $\text{NaBH}_4$ ; (c) 1 mM  $\text{Ag}^+$  + 10 mM L-ascorbic acid; (d) 1 mM  $\text{Ag}^+$  + 10 mM sodium citrate.

ductants resulted in different degree of supersaturation, leading to different capabilities to induce nucleation kinetics.

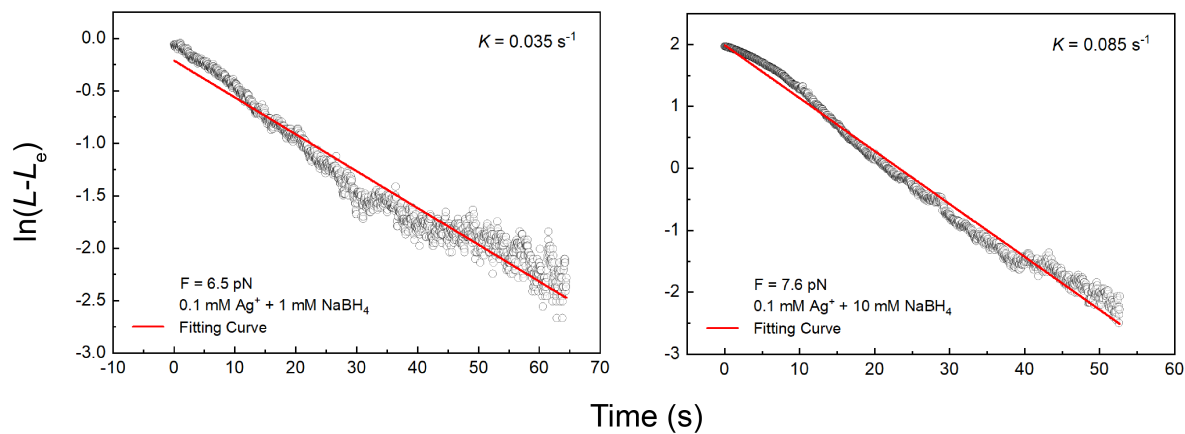

**Figure S7** Plots of  $\ln(L - L_e)$  as a function of time and the fitting curves using Eq.(10) under varying reductant concentrations.

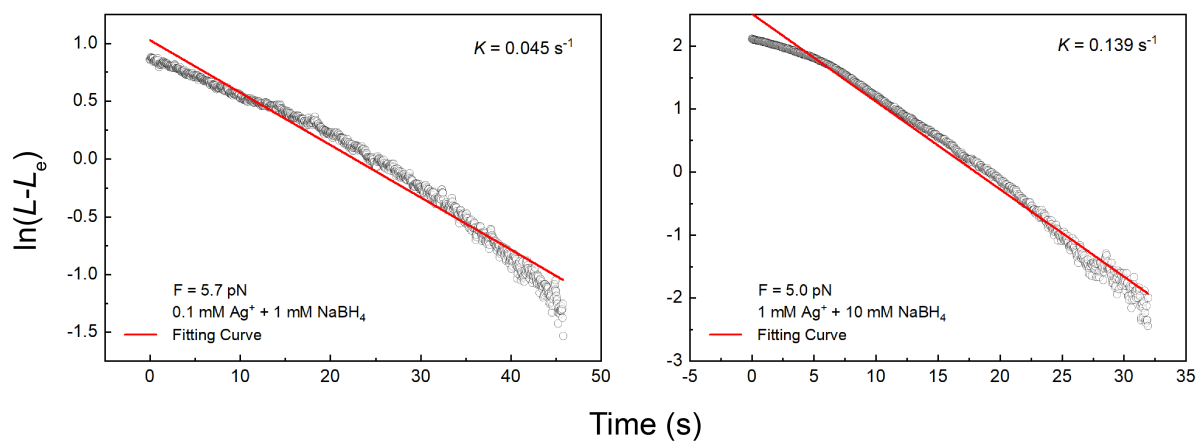

**Figure S8** Plots of  $\ln(L - L_e)$  as a function of time and the fitting curves using Eq.(10) under varying  $\text{Ag}^+$  concentrations.

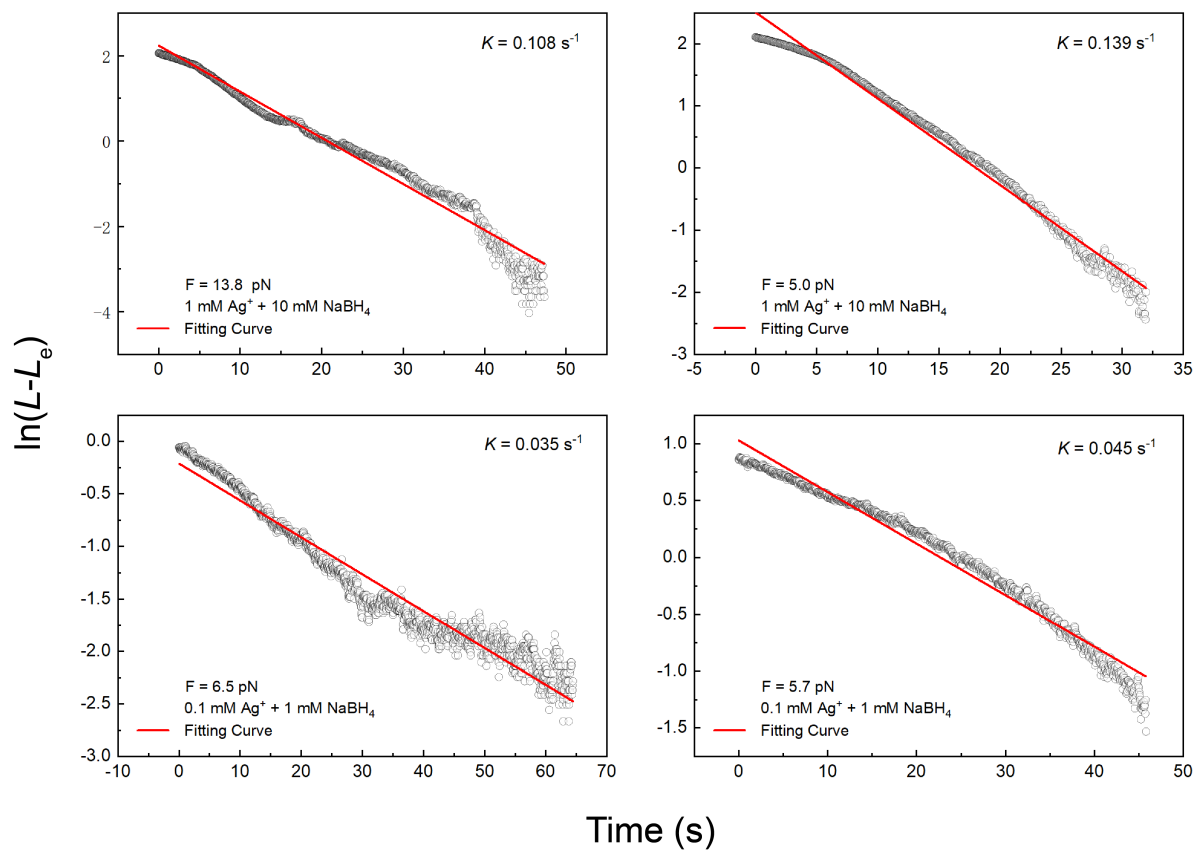

**Figure S9** Plots of  $\ln(L - L_e)$  as a function of time and the fitting curves using Eq.(10) under different forces.
